# Supplementary material for: Correcting for the bias due to expression specificity improves the estimation of constrained evolution of expression between mouse and human
Source: PubMed Central journal article supplement — Bioinformatics. 2012 May 9;28(14):1865–72. doi: 10.1093/bioinformatics/bts266 (PMC3389764; doi:10.1093/bioinformatics/bts266), 2012-05-09
Supplement: supp_bts266_SupplementaryMaterials.pdf [file supp_bts266_SupplementaryMaterials.pdf]

## Supplementary materials: Correcting for the bias due to expression specificity improves the estimation of constrained evolution of expression between mouse and human

Barbara Piasecka<sup>1,2,3</sup>, Marc Robinson-Rechavi<sup>1,3,\*</sup>, Sven Bergmann<sup>2,3,\*</sup>

**1** Department of Ecology and Evolution, University of Lausanne, Lausanne, Switzerland

**2** Department of Medical Genetics, University of Lausanne, Lausanne, Switzerland

**3** Swiss Institute of Bioinformatics, Lausanne, Switzerland

\* E-mail: Sven.Bergmann@unil.ch; Marc.Robinson-Rechavi@unil.ch

### Theoretical analysis

Here we prove that for data transformed into  $z$ -scores the Pearson's correlation coefficient and the squared Euclidean distance are linearly dependent.

Let  $\mathbf{x}$  be a vector of expression values of a given gene measured in  $n$  conditions. The  $z$ -score vector of  $\mathbf{x}$  is calculated as follows:

$$\mathbf{z}_x = \frac{\mathbf{x} - \bar{x}}{s_x} = \frac{\tilde{\mathbf{x}}}{s_x}, \quad (1)$$

where  $\bar{x}$  is a mean and  $s_x$  is a standard deviation of gene expression values.  $s_x$  is defined as:

$$s_x = \sqrt{\frac{1}{n} \sum_{i=1}^n (x_i - \bar{x})^2} \quad (2)$$

Euclidean norm of vector  $\mathbf{x}$  is defined as:

$$\|\mathbf{x}\| = \sqrt{\sum_{i=1}^n x_i^2} \quad (3)$$

To normalize vector  $\tilde{\mathbf{x}}$  we divide it by its Euclidean norm. We refer to it as  $z$ -like normalization of vector  $\mathbf{x}$  and denote it as  $\tilde{\mathbf{z}}_x$ :

$$\tilde{\mathbf{z}}_x = \frac{\tilde{\mathbf{x}}}{\|\tilde{\mathbf{x}}\|} = \frac{\tilde{\mathbf{x}}}{\sqrt{\sum_{i=1}^n \tilde{x}_i^2}} = \frac{\mathbf{x} - \bar{x}}{\sqrt{\sum_{i=1}^n (x_i - \bar{x})^2}} = \frac{\mathbf{x} - \bar{x}}{\sqrt{n} \sqrt{\frac{1}{n} \sum_{i=1}^n (x_i - \bar{x})^2}} = \frac{1}{\sqrt{n}} \mathbf{z}_x \quad (4)$$

So the  $z$ -score vector can be represented as:

$$\mathbf{z}_x = \sqrt{n} \tilde{\mathbf{z}}_x \quad (5)$$

The Pearson's correlation coefficient between vectors  $x$  and  $y$  is defined as:

$$r_{xy} = \frac{1}{n} \sum_{i=1}^n \frac{(x_i - \bar{x})(y_i - \bar{y})}{s_x s_y} = \frac{1}{n} \mathbf{z}_x \mathbf{z}_y = \tilde{\mathbf{z}}_x \tilde{\mathbf{z}}_y \quad (6)$$

The Euclidean distance between vectors  $\mathbf{x}$  and  $\mathbf{y}$  is defined as:

$$d_{xy} = \|\mathbf{x} - \mathbf{y}\| = \sqrt{\sum_{i=1}^n (x_i - y_i)^2} \quad (7)$$

The squared Euclidean distance between  $\tilde{\mathbf{z}}_{\mathbf{x}}$  and  $\tilde{\mathbf{z}}_{\mathbf{y}}$  can be expressed as follows:

$$d_{\tilde{\mathbf{z}}_{\mathbf{x}}\tilde{\mathbf{z}}_{\mathbf{y}}}^2 = \|\tilde{\mathbf{z}}_{\mathbf{x}} - \tilde{\mathbf{z}}_{\mathbf{y}}\|^2 = \|\tilde{\mathbf{z}}_{\mathbf{x}}\|^2 + \|\tilde{\mathbf{z}}_{\mathbf{y}}\|^2 - 2\tilde{\mathbf{z}}_{\mathbf{x}}\tilde{\mathbf{z}}_{\mathbf{y}} \quad (8)$$

Replacing  $\tilde{\mathbf{z}}_{\mathbf{x}}\tilde{\mathbf{z}}_{\mathbf{y}}$  by equation 6 we obtain:

$$\begin{aligned} d_{\tilde{\mathbf{z}}_{\mathbf{x}}\tilde{\mathbf{z}}_{\mathbf{y}}}^2 &= \|\tilde{\mathbf{z}}_{\mathbf{x}} - \tilde{\mathbf{z}}_{\mathbf{y}}\|^2 = \|\tilde{\mathbf{z}}_{\mathbf{x}}\|^2 + \|\tilde{\mathbf{z}}_{\mathbf{y}}\|^2 - 2r_{\mathbf{xy}} \\ &= 1 + 1 - 2r_{\mathbf{xy}} \\ &= 2 - 2r_{\mathbf{xy}} \\ &= 2(1 - r_{\mathbf{xy}}) \end{aligned} \quad (9)$$

We see from equation 9 that in case of  $z$ -like normalization there is a linear dependence between the squared Euclidean distance ( $d^2$ ) and the Pearson's distance ( $1 - r$ ), namely:

$$d_{\tilde{\mathbf{z}}_{\mathbf{x}}\tilde{\mathbf{z}}_{\mathbf{y}}}^2 = 2(1 - r_{\mathbf{xy}}) \quad (10)$$

## Numerical analysis

### Dependence between Pearson's and Euclidean distances for different normalizations

In order to illustrate the strength of dependence between the Pearson's and the Euclidean distances for different data normalization modes, we calculated them on the human-mouse gene expression data from the GNF atlas (Su *et al.* 2004). The data consisted of 27 homologous organ groups (table S1) and 8,942 one-to-one orthologous gene pairs. For every gene expression profile, within both species, we applied Manhattan, Euclidean and  $z$ -like normalization followed by the Pearson's correlation coefficient and the Euclidean distance calculation. As predicted by eq. 9,  $r$  and  $d^2$  were linearly dependent for  $z$ -like normalization (figure S1C). In contrast, for Manhattan and Euclidean normalizations the correlation between  $r$  and  $d^2$  was low (figure S1A-B).

### Dependence between Euclidean distance and expression specificity for different normalizations

In order to explain the dependence between the distance measure for different normalization and the expression specificity of compared genes we used simulated data:

1. two genes with uniform expression levels across 50 conditions (figure S2A)
2. two genes with expression specific to a single condition (figure S2B)

We calculated  $d_E^E$ ,  $d_E^Z$  and  $r$  for both pairs of genes. Intuitively, one might assume that  $d_{ES}$  (or  $r$ ) for two pairs of genes with conserved expression pattern should be similar and close to zero. However, because of the mathematical properties of the transformation used (subtracting the mean, dividing by the euclidean norm), measured distances are different for different normalizations and expression specificity. Note that  $d_E^E$  can be estimated by summing squared distances (in the  $y$ -direction) from the points (representing the expression values of two genes for a given condition) to the identity line  $y = x$ . Simply put, the further away from the identity line the points are, the higher the  $d_E$  between two expression profile is.  $d_E^E$  is lower for uniformly expressed genes (figure S2C) than for specifically expressed genes (figure S2D). In contrast,  $d_E^Z$  is very high for uniformly expressed genes (figure S2E) and very low for specifically expressed genes (figure S2F). The reason is that  $d_E^Z = \sqrt{2(1 - r)}$  is a decreasing function of  $r$ , and  $r$  is around 0 for

uniformly expressed genes (figure S2E), and high for specifically expressed genes (figure S2F). In the first case,  $r$  reflects mainly the noise of the measurement. In the second case, the value of  $r$  is driven by the single outlier.

We illustrate the correlation between the distance and expression specificity using replicated data, both from mouse and human. We considered only the genes with both replicates in the same  $\tau$ -group. We calculated the correlation between the distance of two replicates and their mean  $\tau$  value. As expected, the correlation was positive for  $d_E^M$  and  $d_E^E$ , and negative for  $d_E^Z$  (figure S3).

## Analysis of mouse gene expression data set

As mentioned in the main text, we performed our study also on mouse gene expression data set from the GNF atlas (Su *et al.* 2004). We divided mouse probe set pairs into three  $\tau$ -groups of similar size (table S2). Similarly to the  $\tau$  distribution in the human data (figure S4A-B), in case of the mouse data  $\tau$  distribution is not uniform (figure S4C-D). Therefore, the first two  $\tau$ -groups consisted mostly of broadly expressed genes ( $\tau < 0.425$ ) and the third  $\tau$ -group contained genes with more specific patterns of expression ( $\tau > 0.425$ ). We measured Euclidean distances for probe set pairs within every  $\tau$ -group and we found that values of  $d_E^M$  and  $d_E^E$  were significantly lower for broadly expressed genes than for organ-specific genes (figure S5A-B). On the contrary, values of  $d_E^Z$  were significantly higher for broadly expressed genes than for organ specific genes (figure S5C). **The same conclusion is reached when the genes are divided into three  $\tau$ -groups with balanced  $\tau$  distribution (figure S6 for human data, and S7 for mouse data).**

We also generated two sets of random mouse probe set pairs. One by random permutation of the two data set, second by the procedure of  $\tau$ -uniform sampling. Again, we found that overrepresentation of broadly expressed genes caused underestimation of  $d_E^M$  and  $d_E^E$  between randomly permuted pairs and overestimation of  $d_E^Z$  between replicates (figure S8).  $d_E^M$  and  $d_E^E$  for  $\tau$ -uniform random pairs seemed to estimate better the expected level of expression divergence under neutral evolution (figure S8).

For the details of this analysis and its conclusions, please refer to the main text.

## Results of the comparative study of human and mouse gene expression with $d_E^M$

As mentioned in the main text, we performed the comparative study of human and mouse gene expression to demonstrate the effect of our approach. Here, we present the results of analogous analysis, but with  $d_E^M$  as a distance measure. We selected 8,942 one-to-one orthologous gene pairs from the human and mouse data sets (Su *et al.* 2004). We created two sets of random gene pairs, using both random permutation and the procedure of  $\tau$ -uniform sampling, and we calculated the Euclidean distance ( $d_E^M$ ) for orthologous gene pairs and for both sets of random pairs. If the  $d_E^M$  value for human-mouse orthologous gene pairs is smaller than the 5th percentile of  $d_E^M$  for randomly paired genes, there is some evidence that the expression evolution of this pair has been constrained (Liao and Zhang 2006). Using randomly permuted gene pairs did not provide clear evidence for constrained evolution (figure S9A). Only 8% of orthologous pairs were identified to have a conserved expression pattern, which was close to the random expectation of 5%. In contrast, using  $\tau$ -uniform random pairs, 29% of orthologous genes were identified to have conserved expression (figure S9).

## Comparison with the study of Liao and Zhang (2006a)

The number of detected genes with conserved expression pattern may seem surprisingly low in comparison to Liao and Zhang (2006), who reported that as much as 84% of genes showed conserved expression between human and mouse. We would like to draw the reader's attention to the fact that Liao and Zhang (2006) used two different metrics to calculate the distance between orthologous genes and between randomly paired genes - the so called net distance and the euclidean distance, respectively. The net distance was defined as  $D = d - (d_h + d_m)/2$ , where  $d$  was the Euclidean distance between mouse and human expression profiles,  $d_h$  was the Euclidean distance between the expression profiles of two randomly picked probe sets for the human gene, and  $d_m$  was the Euclidean distance between the expression profiles of two randomly picked probe sets for the mouse gene. We believe that the incompatibility of the distances calculated over orthologous and random gene pairs caused the overestimation of expression conservation. The authors argued that they applied the correction only for orthologous genes, because "randomly paired genes should have no expression similarity; thus, the Euclidean distance do not require correction" (page 535 in Liao and Zhang (2006)). Note that this implies that authors assumed in advance, that orthologous genes should be similar and because of that they corrected only their distance. Thus, the method applied by Liao and Zhang (2006) implies by default a difference between distributions of distance values for orthologous genes and randomly paired genes. Here, we demonstrate that for two sets of randomly paired genes, which by definition should display a similar rate of divergence, the net distance is significantly lower than the Euclidean distance (figure S10). Consequently, the method used in Liao and Zhang (2006) clearly introduces a bias towards overestimation of conservation.

## References

- Domazet-Lošo, T. and Tautz, D. (2010). A phylogenetically based transcriptome age index mirrors ontogenetic divergence patterns. *Nature*, **468**(7325), 815–8.
- Liao, B.-Y. and Zhang, J. (2006). Evolutionary conservation of expression profiles between human and mouse orthologous genes. *Mol Biol Evol*, **23**(3), 530–540.
- Su, A. I., Wiltshire, T., Batalov, S., Lapp, H., Ching, K. A., Block, D., Zhang, J., Soden, R., Hayakawa, M., Kreiman, G., Cooke, M. P., Walker, J. R., and Hogenesch, J. B. (2004). A gene atlas of the mouse and human protein-encoding transcriptomes. *Proc Natl Acad Sci U S A*, **101**(16), 6062–6067.

## Supplementary Tables and Figures

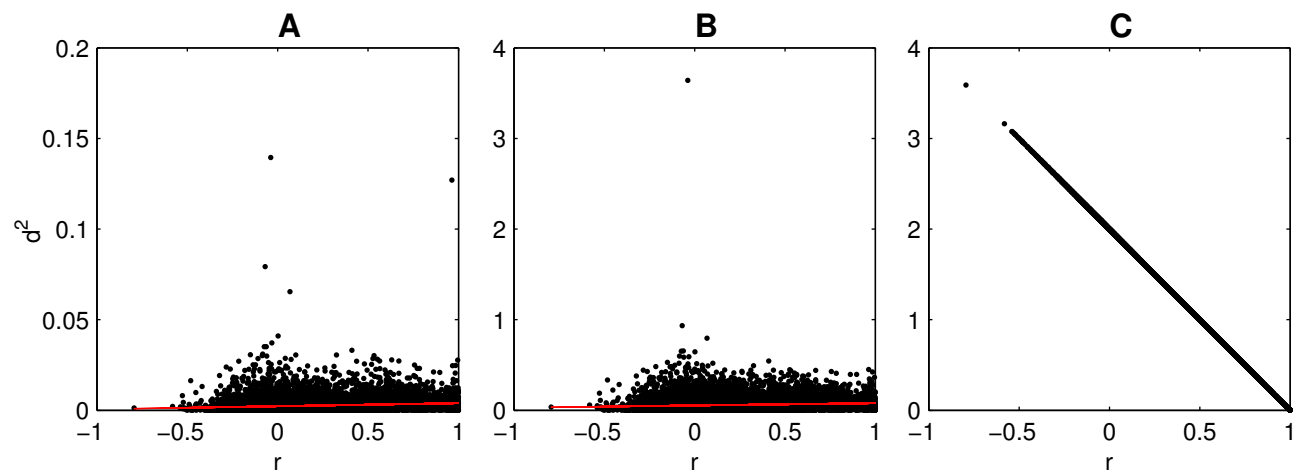

**Figure S1.** Interdependence between  $r$  and  $d$  depends on data normalization mode. Both for Manhattan (A) and Euclidean (B) normalizations the correlation between  $r$  and  $d^2$  is low (0.12 and 0.09, respectively). (C) For  $z$ -like normalization there is linear dependence between  $r$  and  $d^2$ .

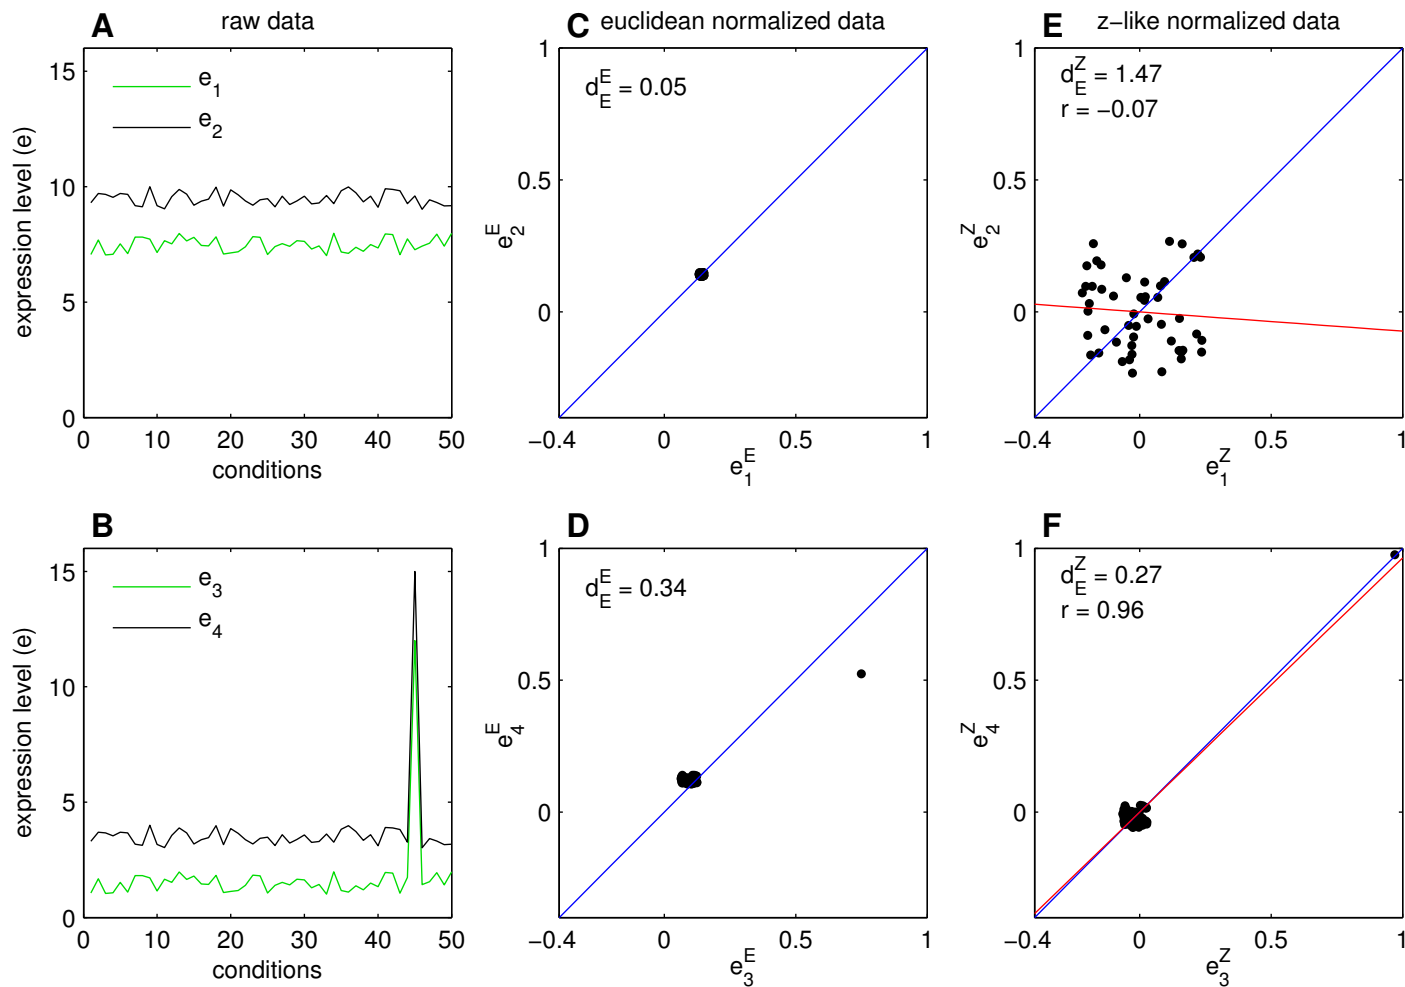

**Figure S2.** Euclidean distance between two genes with conserved expression patterns (A, B) depends on data normalization mode and specificity of genes expression. For Euclidean normalization the distance is lower for genes expressed over all conditions (C) than for specifically expressed genes (D). For  $z$ -like normalization the distance is higher for genes expressed over all conditions (E) than for specifically expressed genes (F). Regression line is plotted in red. Identity line ( $y = x$ ) is plotted in blue. Note that  $d_E^2$  can be estimated by summing squared distances (in the  $y$ -direction) from the points to the blue line.

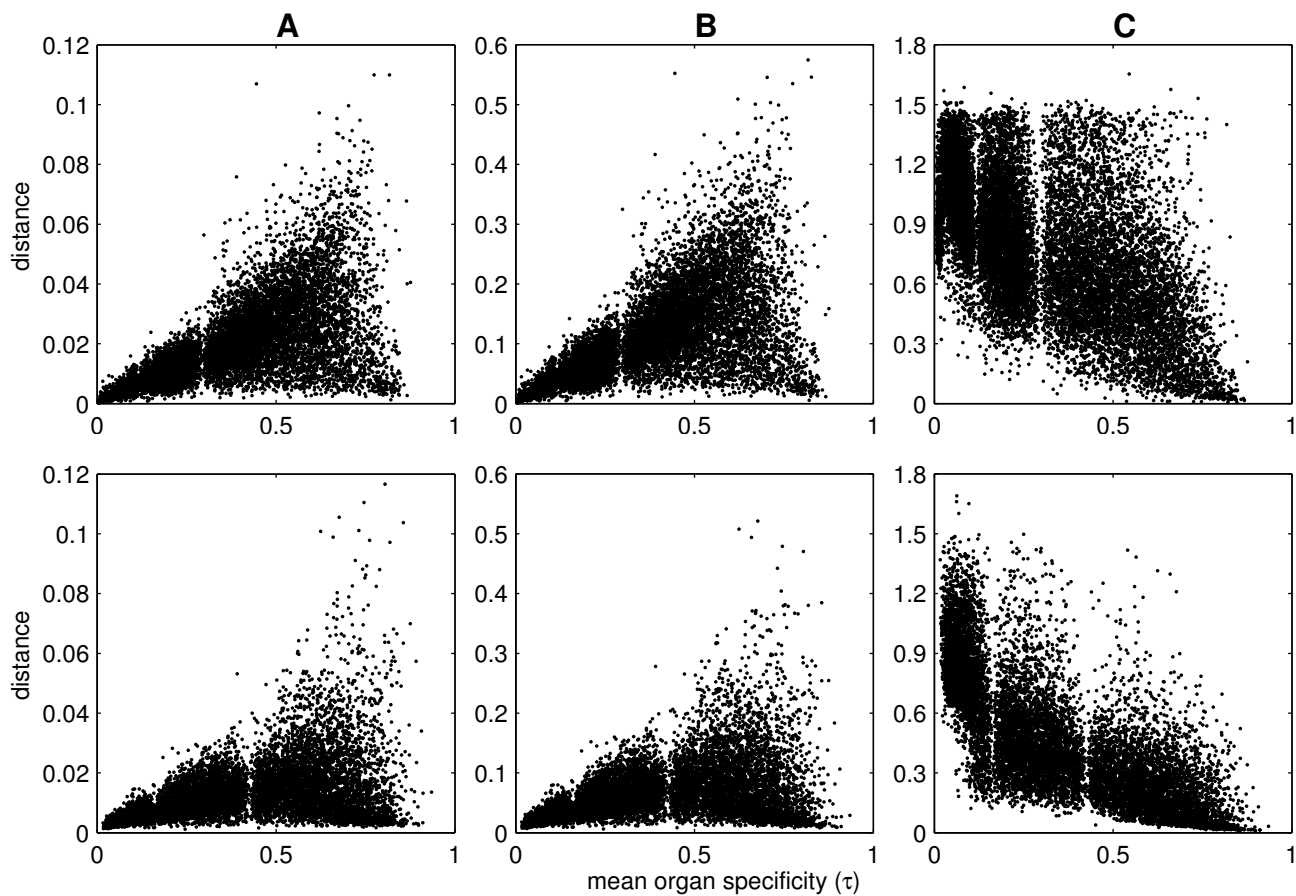

**Figure S3.** Euclidean distance between replicates (simulating genes with conserved expression patterns) depends on data normalization and specificity of genes expression. For Manhattan and Euclidean normalization (A, B) the distance is positively correlated with the expression specificity, whereas for  $z$ -like normalization (C) this correlation is negative. Top: human replicates. Spearman correlation coefficients: for  $d_E^M$ : 0.89, for  $d_E^E$ : 0.88, for  $d_E^Z$ :  $-0.56$ . Bottom: mouse replicates. Spearman correlation coefficients: for  $d_E^M$ : 0.68, for  $d_E^E$ : 0.64, for  $d_E^Z$ :  $-0.81$ .

**Table S1.** List of homologous organ groups (HOGs) and their corresponding organs (sample names) in mouse and human

| HOG id      | HOG name                     | sample name (human)                                                                                                                                                                                                                                                                              | sample name (mouse)                                              |
|-------------|------------------------------|--------------------------------------------------------------------------------------------------------------------------------------------------------------------------------------------------------------------------------------------------------------------------------------------------|------------------------------------------------------------------|
| HOG:0001141 | adrenalgland_interrenalgland | 3AJZ02022645_adrenal_gland.CEL<br>1BJZ02022646_adrenalgland.CEL<br>1BJZ02022761_adrenalgland.CEL<br>3AJZ02022762_adrenal_gland.CEL                                                                                                                                                               | MGJZ030211002Aadrenalgland.CEL<br>MGJZ030211002Badrenalgland.CEL |
| HOG:0001277 | amygdala                     | 1BMH02022705_Brain_Amygdala.CEL<br>1BMH02022105_Brain_Amygdala.CEL<br>3AMH02022205_Brain_Amygdala.CEL<br>3AMH02022605_Brain_Amygdala.CEL                                                                                                                                                         | MGMH030211062Aamygdala.CEL<br>MGMH030211062Bamygdala.CEL         |
| HOG:0001218 | bonemarrow                   | 3AJZ02022865_bone_marrow.CEL<br>3AJZ02030474_bonemarrow.CEL<br>1BJZ02022866_bonemarrow.CEL<br>1BJZ02030473_bonemarrow.CEL                                                                                                                                                                        | MGMH030312056Abonemarrow.CEL<br>MGMH030312056Bbonemarrow.CEL     |
| HOG:0000024 | cerebellum                   | 3AJZ02022764_cerebellum.CEL<br>1BJZ02022763_cerebellum.CEL<br>1BJZ02051612_CerebellumPeduncles.CEL<br>1BJZ02022648_cerebellum.CEL<br>3AJZ02061902_CerebellumPeduncles.CEL<br>1BJZ02051611_CerebellumPeduncles.CEL<br>3AJZ02022647_cerebellum.CEL<br>3AJZ02051604_CerebellumPeduncles.CEL         | MGJZ030207007Acerebellum.CEL<br>MGJZ030207007Bcerebellum.CEL     |
| HOG:0000722 | cerebralcortex               | 3AJZ02060407_CingulateCortex.CEL<br>3AJZ02053109_PrefrontalCortex.CEL<br>3AJZ02060508_CingulateCortex.CEL<br>1BJZ02060505_CingulateCortex.CEL<br>1BJZ02060408_CingulateCortex.CEL<br>3AJZ02053111_PrefrontalCortex.CEL<br>1BJZ02053112_PrefrontalCortex.CEL<br>1BJZ02053110_PrefrontalCortex.CEL | MGJZ030212008Bcerebralcortex.CEL<br>MGMH030312008Acortex.CEL     |



|             |                    |                                                                                                                                                                                                                                                                                                  |                                                                                                                              |
|-------------|--------------------|--------------------------------------------------------------------------------------------------------------------------------------------------------------------------------------------------------------------------------------------------------------------------------------------------|------------------------------------------------------------------------------------------------------------------------------|
| HOG:0000222 | dorsalrootganglion | 3ARS02080736e_DRG.CEL<br>3ARS02080736f_DRG.CEL<br>1BRS02081536e_DRG.CEL<br>3AJZ02081478a_Superior_Cervical_Ganglion.CEL<br>1BJZ02081478a_Superior_Cervical_Ganglion.CEL<br>3AJZ02081478b_Superior_Cervical_Ganglion.CEL<br>1BJZ02081478b_Superior_Cervical_Ganglion.CEL<br>1BRS02081536f_DRG.CEL | MGJZ030312065Bdorsalrootganglion.CEL<br>MGJZ030312065Adorsalrootganglion.CEL                                                 |
| HOG:0000276 | heart              | 1BRS02080872a_atrioventricular_node.CEL<br>3ARS02080772a_atrioventricular_node.CEL<br>3AJZ02021909_HEART.CEL<br>1BRS02080872b_atrioventricular_node.CEL<br>1BMH02022808_Heart.CEL<br>1BMH02022802_Heart.CEL<br>3AMH02030702_Heart.CEL<br>3ARS02080772b_atrioventricular_node.CEL                 | MGJZ030207054Bheart.CEL<br>MGJZ030207054Aheart.CEL                                                                           |
| HOG:0000143 | hypophysis         | 3AJZ02022867_Pituitary.CEL<br>1BJZ02061809_pituitary.CEL<br>1BJZ02061909_pituitary.CEL<br>3AJZ02030476_pituitary.CEL                                                                                                                                                                             | MGJZ030228080Bpituitary.CEL<br>MGJZ030228080Apituitary.CEL                                                                   |
| HOG:0000179 | hypothalamus       | 3AJZ02060506_Hypothalamus.CEL<br>1BJZ02060406_Hypothalamus.CEL<br>3AJZ02061907_Hypothalamus.CEL<br>1BJZ02072563_Hypothalamus.CEL                                                                                                                                                                 | MGMH030212053Ahypothalamus.CEL<br>MGMH030402094Bpreoptic.CEL<br>MGMH030401094Apreoptic.CEL<br>MGMH030212053Bhypothalamus.CEL |
| HOG:0000257 | liver              | 3AJZ02021915_LIVER.CEL<br>1BMH02022812_Liver.CEL<br>1BMH02022806_Liver.CEL<br>3AMH02030706_Liver.CEL                                                                                                                                                                                             | MGJZ030211018Aliver.CEL<br>MGJZ030211018Bliver.CEL                                                                           |
| HOG:0000310 | lung_swimbladder   | 3AJW02021805_lung.CEL<br>3AMH02030705_Lung.CEL<br>1BMH02022805_Lung.CEL<br>1BMH02022811_Lung.CEL                                                                                                                                                                                                 | MGMH030211019Blung.CEL<br>MGMH030211019Alung.CEL                                                                             |
| HOG:0001273 | lymphnode          | 3AJZ02022115_lymph_node.CEL<br>3AJZ02022232_lymph_node.CEL<br>1BJZ02022116_lymphnode.CEL<br>1BJZ02022231_lymphnode.CEL                                                                                                                                                                           | MGJZ030207020Alymphnode.CEL<br>MGJZ030207020Blymphnode.CEL                                                                   |

|             |                |                                                                                                                                                                          |                                                                                                                                                     |
|-------------|----------------|--------------------------------------------------------------------------------------------------------------------------------------------------------------------------|-----------------------------------------------------------------------------------------------------------------------------------------------------|
| HOG:000039  | metanephros    | 3AJZ02022760_kidney.CEL<br>3AJZ02022643_kidney.CEL<br>1BJZ02030684_KIDNEY.CEL<br>1BJZ02022644_kidney.CEL                                                                 | MGMH030312016Akidney.CEL<br>MGJZ030211016Bkidney.CEL                                                                                                |
| HOG:000033  | olfactorybulb  | 1BJZ02060511_OlfactoryBulb.CEL<br>3AJZ02072561_OlfactoryBulb.CEL<br>3AJZ02060514_OlfactoryBulb.CEL<br>1BJZ02060414_OlfactoryBulb.CEL                                     | MGJZ030212070Bolfactorybulb.CEL<br>MGJZ030212070Aolfactorybulb.CEL                                                                                  |
| HOG:0000251 | ovary          | 3AJZ02052302_Ovary.CEL<br>3AJZ02050806_Ovary.CEL<br>1BJZ02052208_Ovary.CEL<br>1BJZ02050813_Ovary.CEL                                                                     | MGMH030402089Boocyte.CEL<br>MGMH030228089Aoocyte.CEL<br>MGMH030312023Aovary.CEL<br>MGMH030312023Bovary.CEL                                          |
| HOG:0000050 | pancreas       | 1BMH02022702_Pancreas.CEL<br>1BJZ02060501_Pancreas.CEL<br>3AJZ02060401_Pancreas.CEL<br>3AJZ02060502_Pancreas.CEL                                                         | MGMH030212060Apancreas.CEL<br>MGMH030212060Bpancreas.CEL                                                                                            |
| HOG:0001266 | placenta       | 3ARS0207263HB_PLACENTA.CEL<br>1BRS0207253HB_PLACENTA.CEL<br>1BRS0207253IB_PLACENTA.CEL<br>3ARS0207253IA_PLACENTA.CEL                                                     | MGJZ030312066Aplacenta.CEL<br>MGJZ030312066Bplacenta.CEL                                                                                            |
| HOG:0001261 | prostate       | 1BMH02022804_Prostate.CEL<br>3AMH02030704_Prostate.CEL<br>1BMH02030601_Prostate.CEL<br>3AJZ02021911_PROSTATE.CEL                                                         | MGJZ030212025Aprostate.CEL<br>MGJZ030212025Bprostate.CEL                                                                                            |
| HOG:0000376 | salivarygland  | 1BJZ02041227_salivarygland.CEL<br>3AJZ02041226_salivarygland.CEL<br>3AJZ02040823_salivarygland.CEL<br>1BJZ02040822_salivarygland.CEL                                     | MGJZ030212027Asalivarygland.CEL<br>MGJZ030212027Bsalivarygland.CEL                                                                                  |
| HOG:0000319 | skeletalmuscle | 1BJZ02083092b_Skeletal_Muscle_Psoas.CEL<br>3AJZ02083092a_Skeletal_Muscle_Psoas.CEL<br>1BJZ02083092a_Skeletal_Muscle_Psoas.CEL<br>3AJZ02083092b_Skeletal_Muscle_Psoas.CEL | MGMH030312028Bskeletalmuscle.CEL<br>MGMH030312028Askeletalmuscle.CEL                                                                                |
| HOG:0000601 | spinalcord     | 3AJZ02022107_spinal_cord.CEL<br>1BJZ02022223_spinalcord.CEL<br>1BJZ02022108_spinalcord.CEL<br>3AJZ02022224_spinal_cord.CEL                                               | MGMH030212058Bspinalcordupper.CEL<br>MGMH030212058A spinalcordupper.CEL<br>MGMH030212057A spinalcordlower.CEL<br>MGMH030212057B spinalcordlower.CEL |

|                                    |         |                                           |                                   |
|------------------------------------|---------|-------------------------------------------|-----------------------------------|
| HOG:0000252                        | testis  | 3AJZ02052114_TestiSeminiferousTubule.CEL  | MGJZ030207135Btestis.CEL          |
|                                    |         | 3AJZ02051707_Testi_GermCell.CEL           | MGJZ030207135Atestis.CEL          |
|                                    |         | 3AJZ02051709_Testi_Intersitial.CEL        |                                   |
|                                    |         | 3AJZ02052108_Testi-GermCell.CEL           |                                   |
|                                    |         | 1BJZ02051708_Testi_GermCell.CEL           |                                   |
|                                    |         | 3AJZ02051711_Testi_LeydigCell.CEL         |                                   |
|                                    |         | 1BJZ02052111_TestiLeydigCell.CEL          |                                   |
|                                    |         | 3AJZ02051713_Testi_SeminiferousTubule.CEL |                                   |
|                                    |         | 3AJZ02052112_TestiLeydigCell.CEL          |                                   |
|                                    |         | 3AJZ02052305_TestiIntersitial.CEL         |                                   |
|                                    |         | 1BJZ02022636_testis.CEL                   |                                   |
|                                    |         | 1BJZ02052113_TestiSeminiferousTubule.CEL  |                                   |
|                                    |         | 1BJZ02052107_TestiGermCell.CEL            |                                   |
|                                    |         | 1BJZ02052109_TestiIntersitial.CEL         |                                   |
|                                    |         | 1BJZ02051712_Testi_LeydigCell.CEL         |                                   |
|                                    |         | 1BJZ02022751_testis.CEL                   |                                   |
|                                    |         | 3AJZ02022752_testis.CEL                   |                                   |
|                                    |         | 3AJZ02022635_testis.CEL                   |                                   |
|                                    |         | 1BJZ02051714_Testi_SeminiferousTubule.CEL |                                   |
| 1BJZ02051710_Testi_Intersitial.CEL |         |                                           |                                   |
| HOG:0000253                        | thymus  | 3AJZ02031411_thymus.CEL                   | MGMH030311036Bthymus.CEL          |
|                                    |         | 1BJZ02022642_thymus.CEL                   | MGMH030311036Athymus.CEL          |
|                                    |         | 3AJZ02022758_thymus.CEL                   |                                   |
| HOG:0000418                        | thyroid | 1BMH02022704_Thyroid.CEL                  | MGMH030212037Athyroid.CEL         |
|                                    |         | 3AMH02022204_Thyroid.CEL                  | MGMH030212037Bthyroid.CEL         |
| HOG:0000419                        | tongue  | 3AJZ02082987B_TONGUE.CEL                  | MGMH030311038Btongueepidermis.CEL |
|                                    |         | 1BJZ022987A_TONGUE.CEL                    | MGMH030311038Atongueepidermis.CEL |
| HOG:0000371                        | trachea | 3AJZ02082987A_TONGUE.CEL                  |                                   |
|                                    |         | 1BJZ022987B_TONGUE.CEL                    |                                   |
|                                    |         | 3AJZ02022639_trachea.CEL                  | MGMH030311039Btrachea.CEL         |
|                                    |         | 1BJZ02022755_trachea.CEL                  | MGMH030311039Atrachea.CEL         |
|                                    |         | 3AJZ02022756_trachea.CEL                  |                                   |
|                                    |         | 1BJZ02022640_trachea.CEL                  |                                   |

---

HOG:0001137 uterus

3AMH02030703\_Uterus.CEL  
1BJZ02083089b\_Uterus\_Corpus.CEL  
3AJZ02083089b\_Uterus\_Corpus.CEL  
1BMH02022809\_Uterus.CEL  
3AJZ02083089a\_Uterus\_Corpus.CEL  
1BMH02022803\_Uterus.CEL  
1BJZ02083089a\_Uterus\_Corpus.CEL  
3AJZ02021913\_\_UTERUS.CEL

---

MGJZ030207041Auterus.CEL  
MGJZ030207041Buterus.CEL

**Table S2.** Composition of three  $\tau$ -groups of mouse probe set (ps) pairs

|                 | Organ-specificity ( $\tau$ ) | Number of mouse ps pairs |
|-----------------|------------------------------|--------------------------|
| $\tau$ -group 1 | $0.011 \leq \tau \leq 0.163$ | 4442                     |
| $\tau$ -group 2 | $0.163 < \tau \leq 0.425$    | 4041                     |
| $\tau$ -group 3 | $0.425 < \tau \leq 0.942$    | 4603                     |

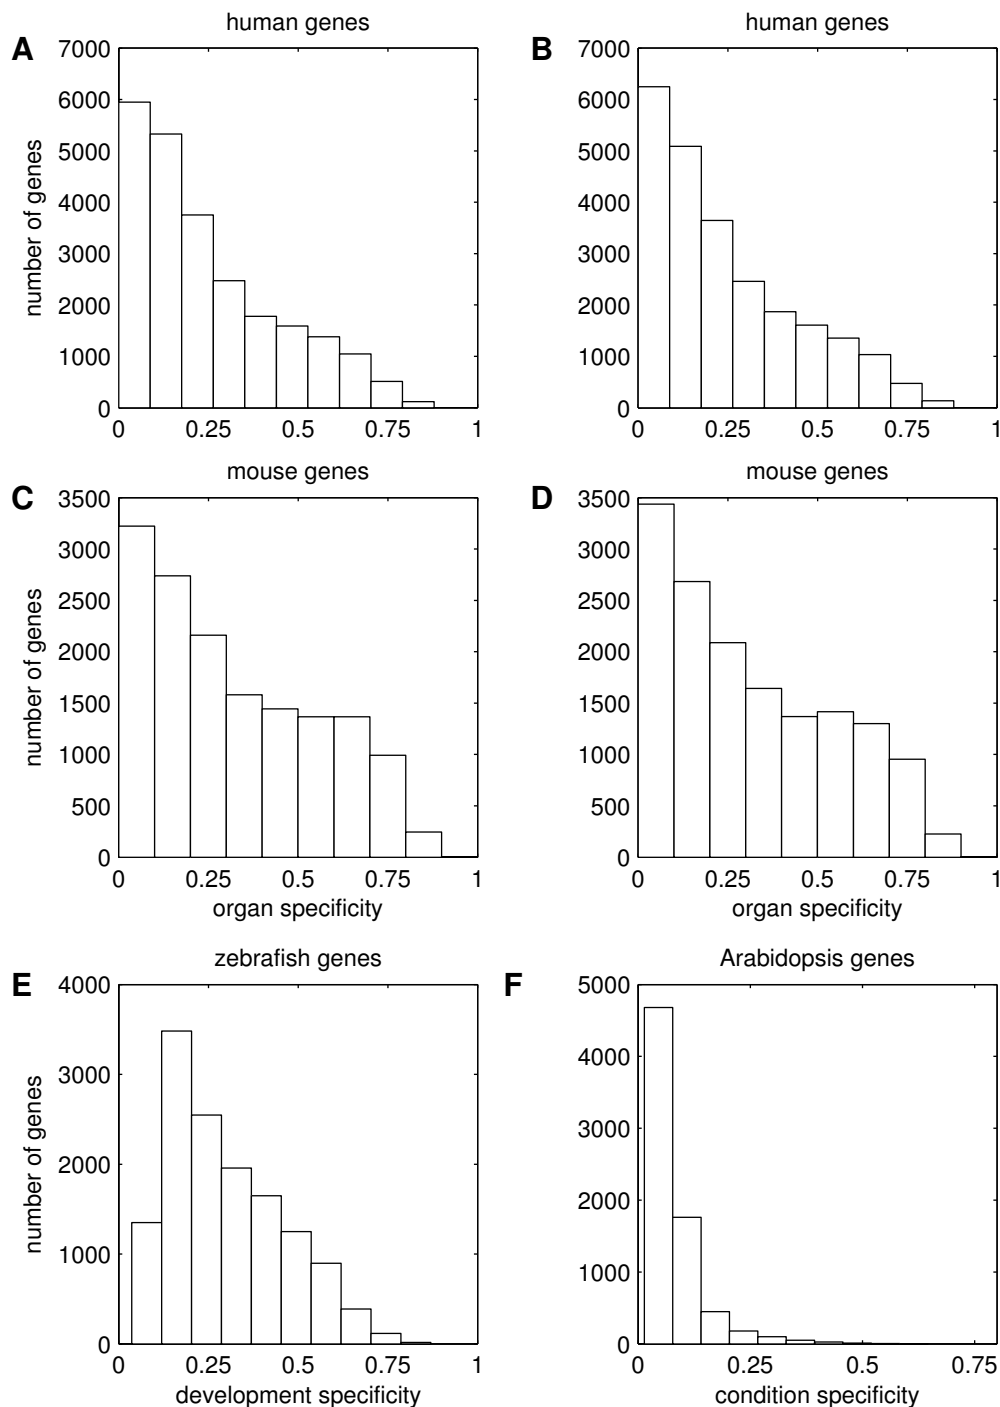

**Figure S4.**  $\tau$  distribution is not uniform in the real data. (A, B)  $\tau$  distribution for human replicates. (C, D)  $\tau$  distribution for mouse replicates. (E)  $\tau$  distribution for zebrafish genes expressed during the ontogeny (Domazet-Lošo and Tautz 2010). (F)  $\tau$  distribution for Arabidopsis genes expressed in different light conditions (NASC 2007, GEO accession number GSE5617).

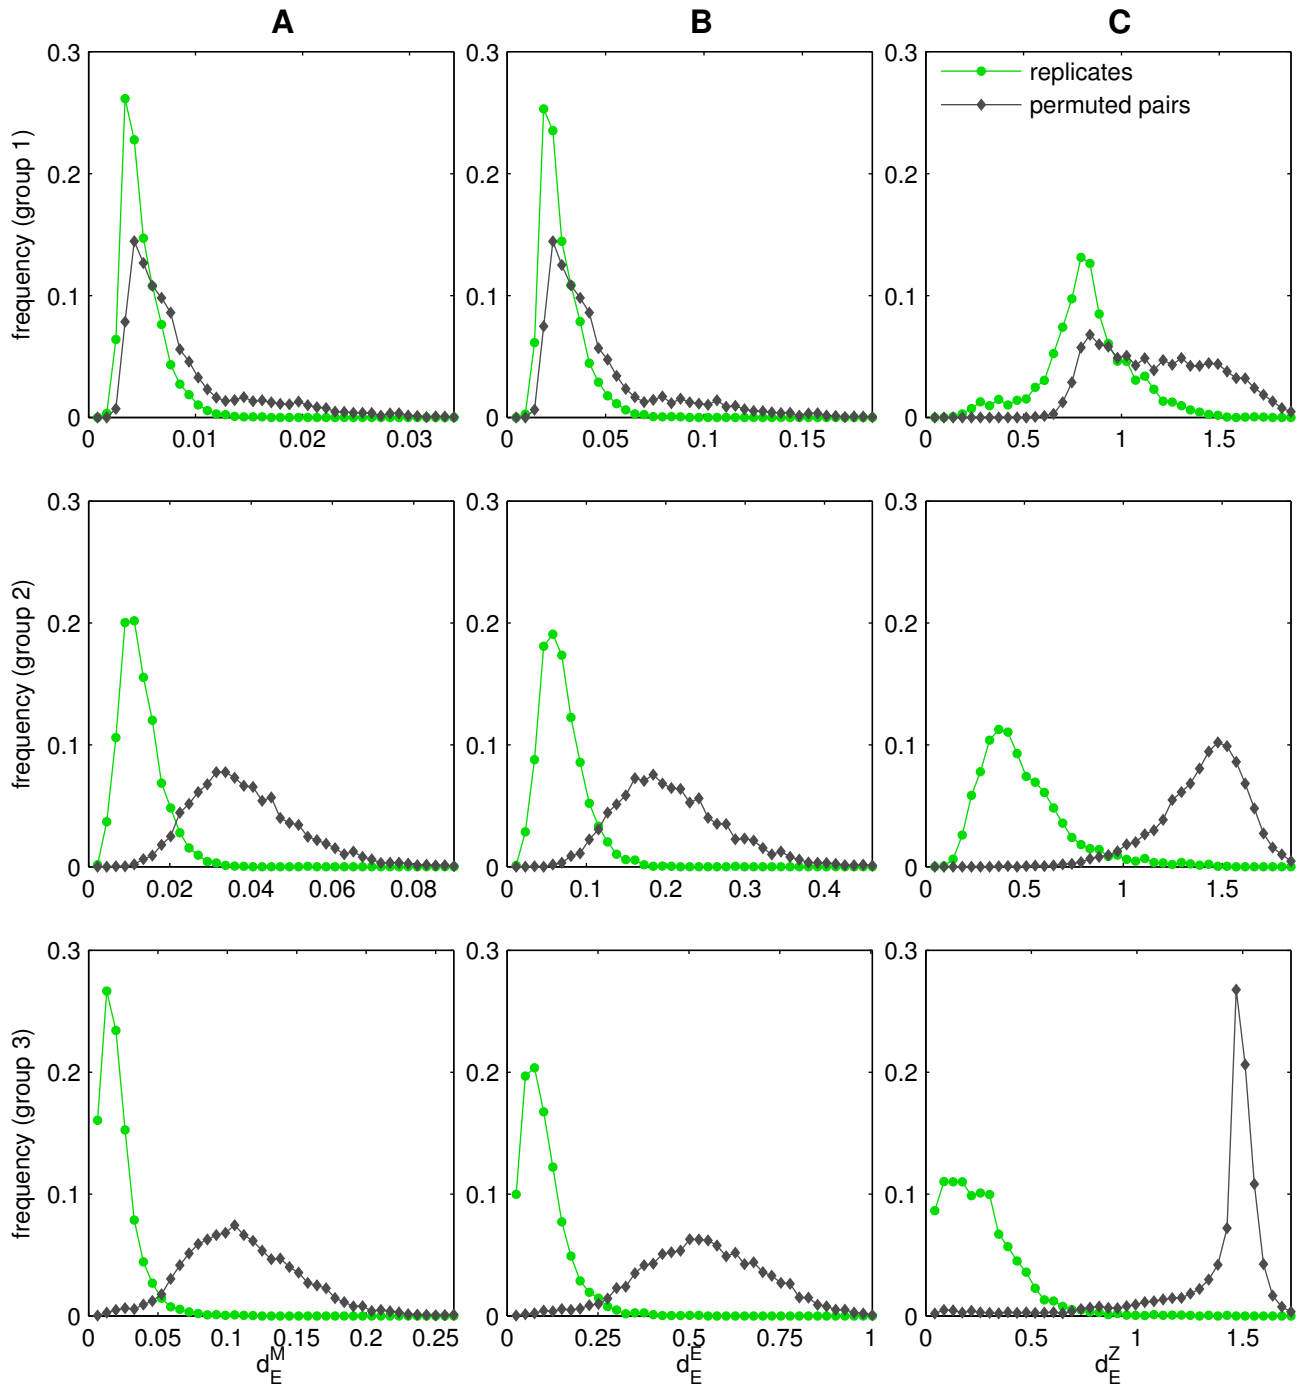

**Figure S5.** The distribution of expression similarity between mouse replicates depends on their organ specificity. (A)  $d_E^M$  and (B)  $d_E^E$  are significantly lower for broadly expressed genes (group 1) than for organ specific genes (group 3). For randomly permuted pairs of genes  $d_E^M$  and  $d_E^E$  also differ between the three  $\tau$ -groups. They are significantly lower for random pairs in group 1 than in group 3. (C)  $d_E^Z$  is significantly higher for broadly expressed genes (group 1) than for organ specific genes (group 3).  $d_E^Z$  for randomly permuted pairs is high in all three groups even in the first  $\tau$ -group, where random pairs consist of two broadly expressed genes (this is a consequence of low  $r$  for uniformly expressed genes) Note that scale of  $x$ -axis differs strongly between graphs.

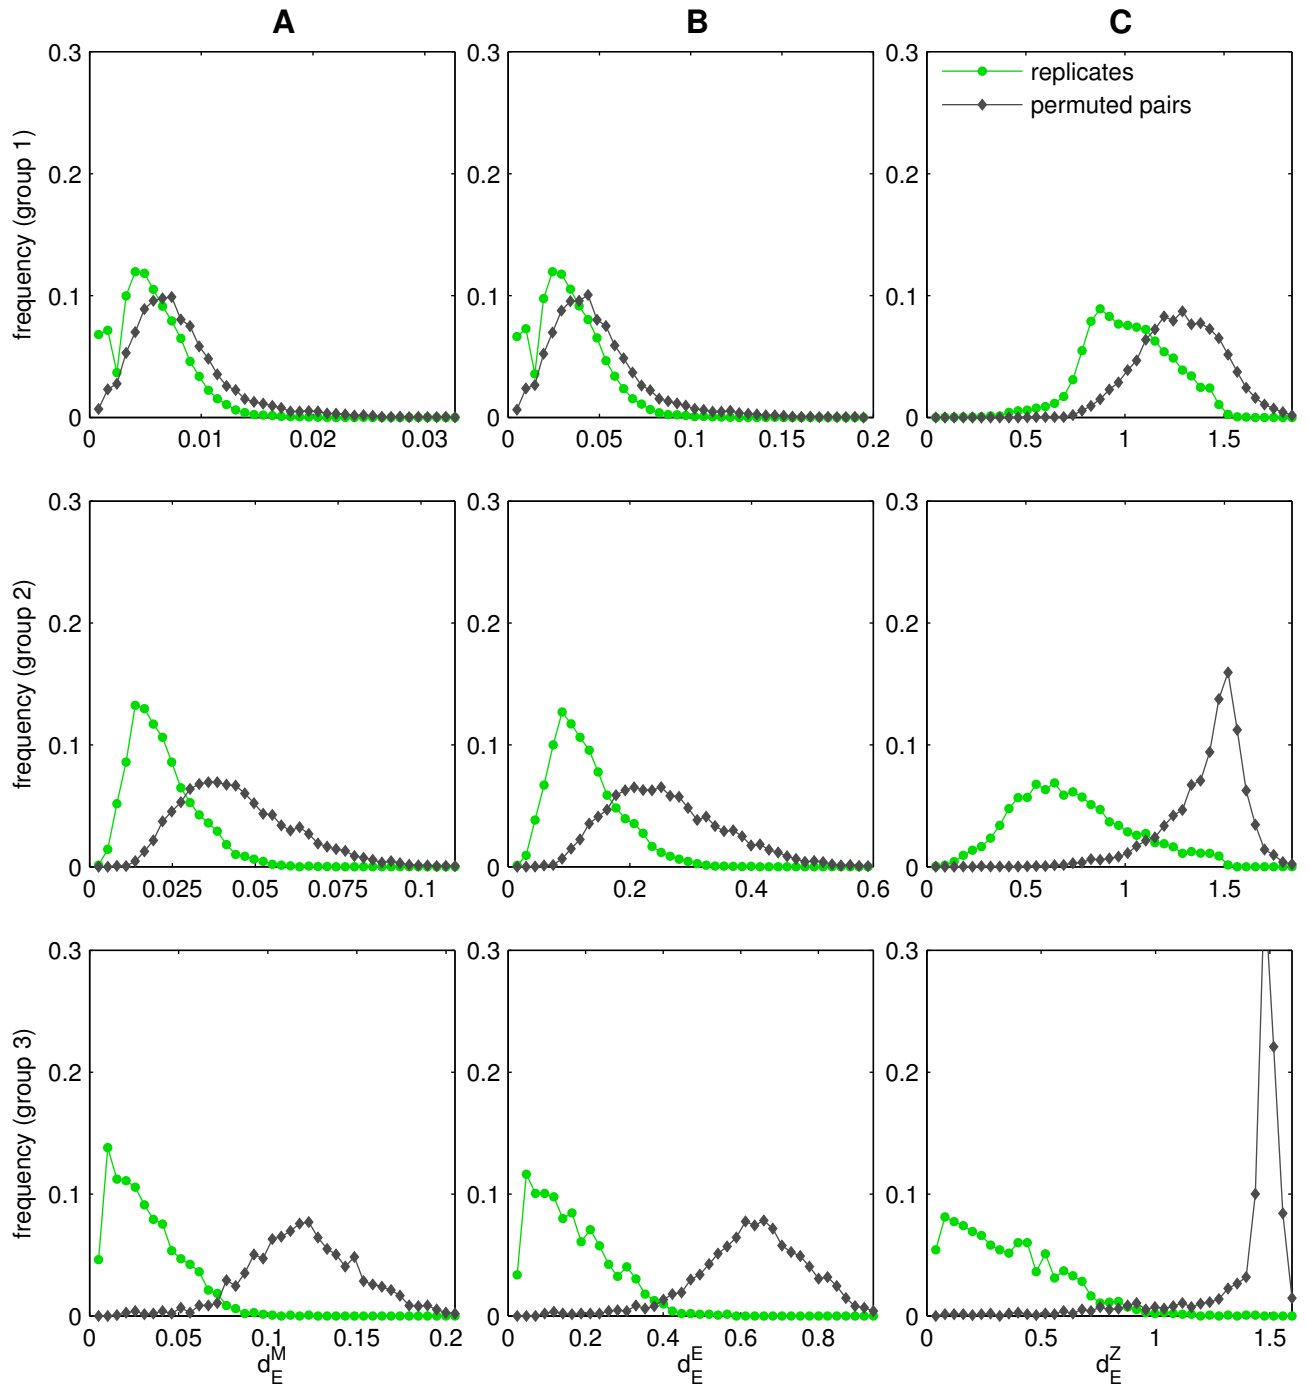

**Figure S6.** The distribution of expression similarity between human replicates depends on their organ specificity. Presented 3 groups of gene pairs have balanced  $\tau$  distribution. Group 1:  $\tau$ : 0 - 0.2, 10723 gene pairs; Group 2:  $\tau$ : 0.2 - 0.6, 7551 gene pairs; Group 3:  $\tau$ : 0.6 - 1, 1514 gene pairs. For the explanation of the figure please refer to figure S5.



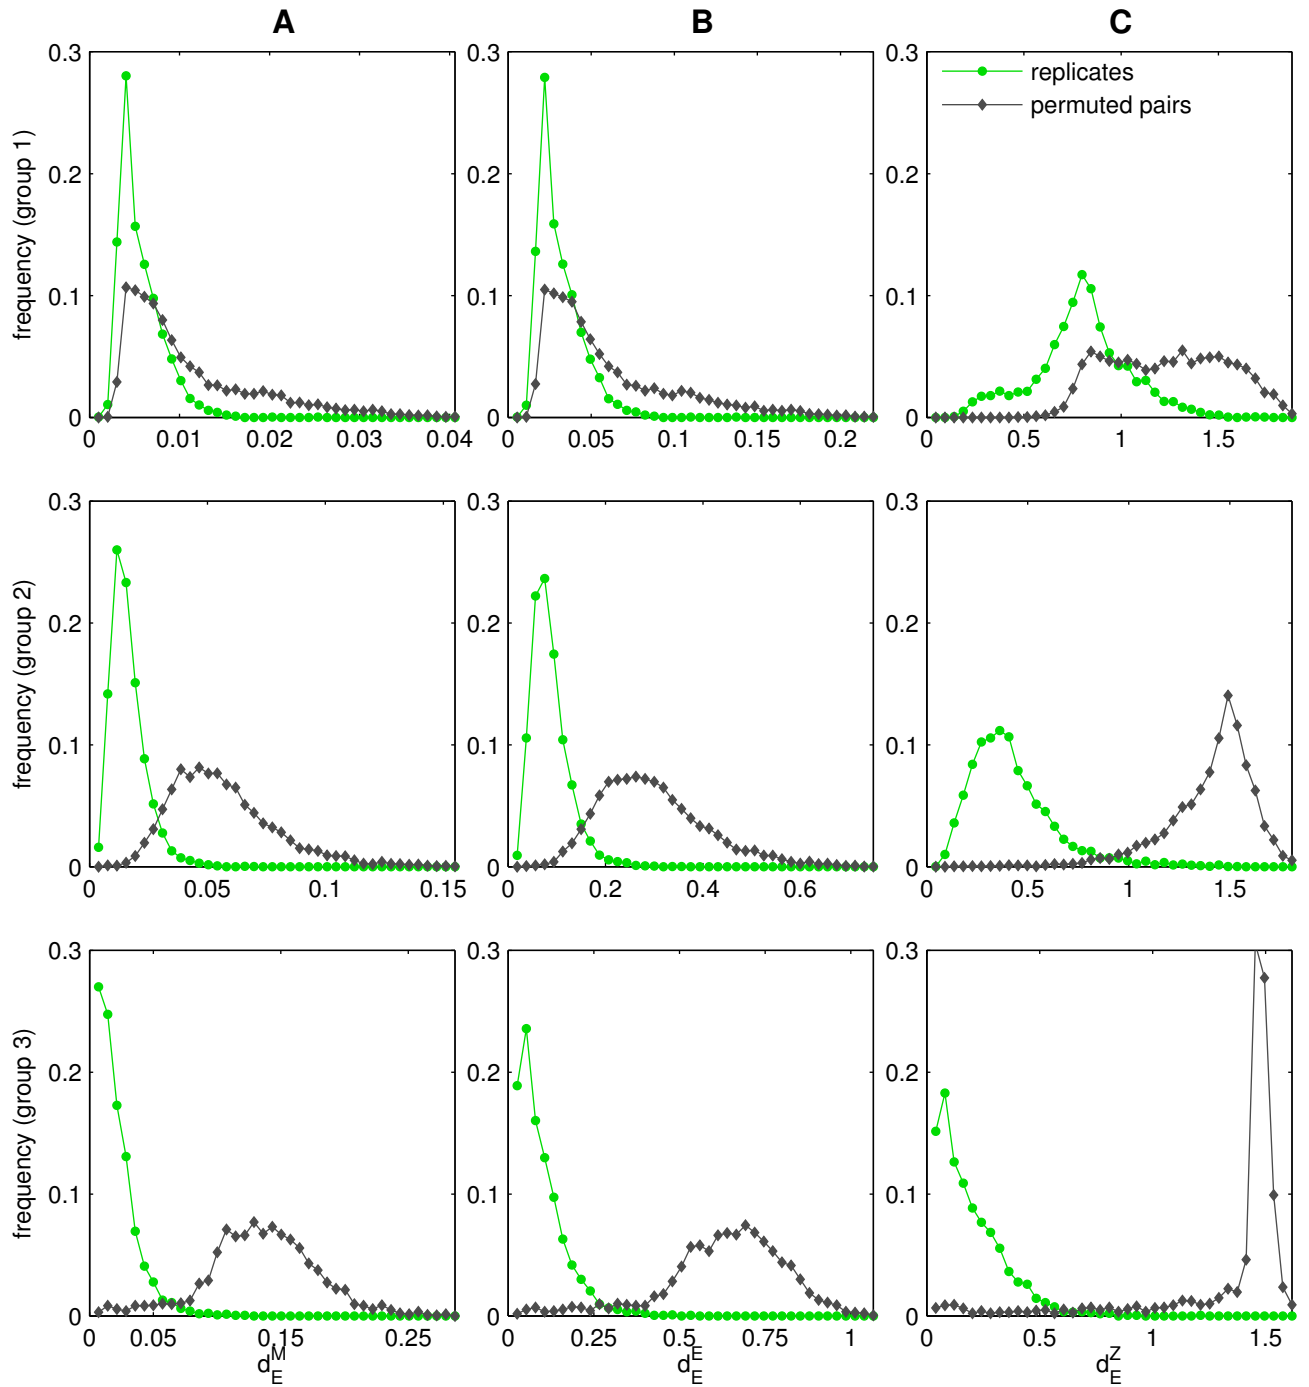

**Figure S7.** The distribution of expression similarity between mouse replicates depends on their organ specificity. Presented 3 groups of gene pairs have balanced  $\tau$  distribution. Group 1:  $\tau$ : 0 - 0.2, 5424 gene pairs; Group 2:  $\tau$ : 0.2 - 0.6, 5688 gene pairs; Group 3:  $\tau$ : 0.6 - 1, 2303 gene pairs. For the explanation of the figure please refer to figure S5.

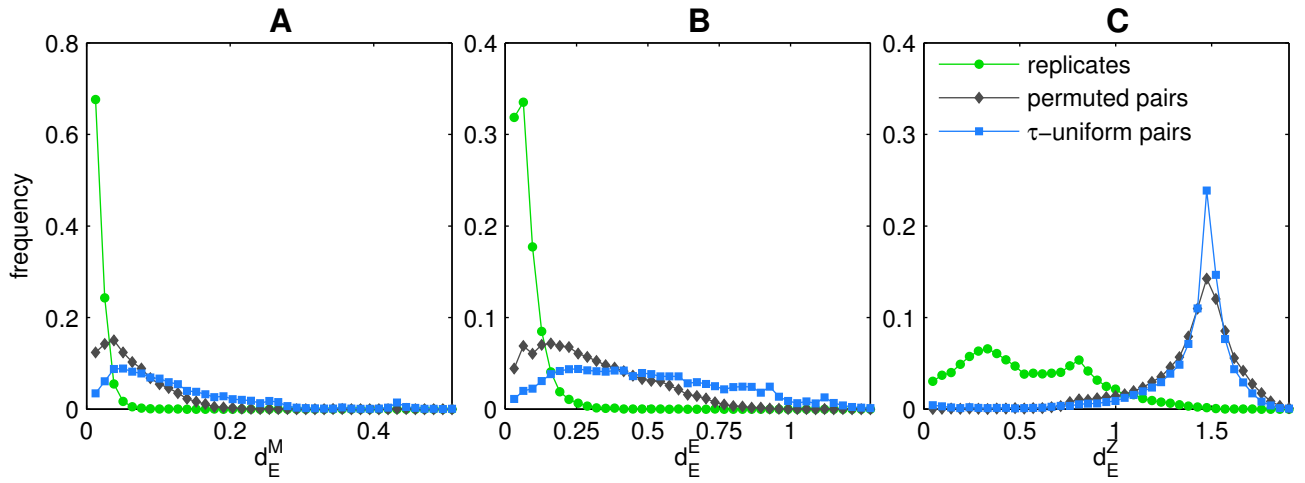

**Figure S8.** Overrepresentation of broadly expressed mouse genes causes underestimation of the conservation of expression when randomly permuted pairs are used to approximate the neutral evolution rate. (A, B) For noticeable number of randomly permuted pairs the distances ( $d_E^M$  and  $d_E^E$ ) are small, indistinguishable from the distances for replicates. (C)  $d_E^Z$  is high both for permuted gene pairs and for the group of replicates. (A, B) For  $\tau$ -uniform random pairs  $d_E^E$  and  $d_E^M$  are higher, which is more consistent with the assumption about neutral evolution from Jordan et al. (2005). (C) distribution of  $d_E^Z$  does not change with the new random pairs set.

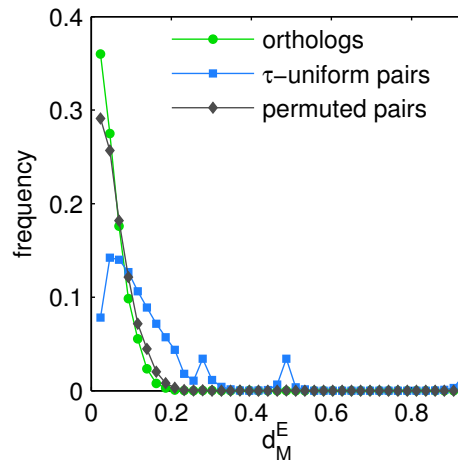

**Figure S9.** The choice of the randomization method changes the conclusions about gene expression evolution between mouse and human. There is no clear evidence for constrained evolution if we compare the distribution of  $d_E^M$  for orthologous (green) and randomly permuted gene pairs (grey). Whereas, comparison of  $d_E^M$  distribution for orthologous (green) and  $\tau$ -uniform random pairs (blue) suggest that expression evolution is far from neutral.

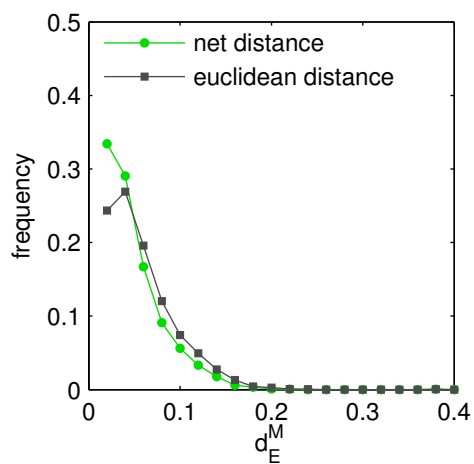

**Figure S10.** One-sided correction of the Euclidean distance lead to different distributions of distance values for two sets of randomly paired genes. Using 3,193 human-mouse orthologous gene pairs (all human genes covered by multiple probe sets), we generated two sets of randomly permuted gene pairs. For the first set (simulating the set of genes with non-conserved expression profiles) we calculated the net distance, for the second set (used to estimate neutral evolution) we calculated the Euclidean distance. Because both sets were "equally random", one should not expect any differences between them. However, as much as 20% of gene pairs from the first random set (green) was detected to be more conserved than gene pairs from the second random set (grey).
